# Supplementary material for: Impact of α-d-glucose pentaacetate on the selective separation of CO2 and SO2 in supported ionic liquid membranes
Source: Royal Society of Chemistry journal article supplement (doi:10.1039/c2gc35224a), 2012-01-01
Supplement: c2gc35224a.pdf [file c2gc35224a.pdf]

## Supplementary Information for:

### Impact of $\alpha$ -D-glucose pentaacetate on the selective separation of CO<sub>2</sub> and SO<sub>2</sub> in supported ionic-liquid membranes

Xingbang Hu, Yaxing Li, Kuan Huang, Shaoling Ma, Hong Yu, Youting Wu<sup>\*</sup>, and Zhibing Zhang

#### Index

Fig. S1 The solubility of CO<sub>2</sub> and SO<sub>2</sub> in different absorbents.

Table S1. The dependence of gas solubility (Sol) in ILs on the pressure (P).

Figure S2. The optimized structures of IL-GPA<sup>•••</sup>CO<sub>2</sub>, and IL-GPA<sup>•••</sup>SO<sub>2</sub>.

Figure S3. The optimized structures of IL<sup>•••</sup>N<sub>2</sub>, IL<sup>•••</sup>CH<sub>4</sub>, GPA<sup>•••</sup>N<sub>2</sub>, and GPA<sup>•••</sup>CH<sub>4</sub>.

Figure S4. The optimized structures of IL-GPA<sup>•••</sup>CO<sub>2</sub>, and IL-GPA<sup>•••</sup>SO<sub>2</sub>. The shown values mean the binding energies between IL-GPA and CO<sub>2</sub>/SO<sub>2</sub>.

Table S2. The 2-molecules interaction energies (in kJ/mol) of IL<sup>•••</sup>gas, GPA<sup>•••</sup>gas, or IL-GPA<sup>•••</sup>gas.

Figure S5. The optimized structures of GPA<sup>•••</sup>CO<sub>2</sub> and GPA<sup>•••</sup>SO<sub>2</sub>.

Figure S6. The optimized structures of [Bmim][BF<sub>4</sub>]<sup>•••</sup>CO<sub>2</sub> and [Bmim][BF<sub>4</sub>]<sup>•••</sup>SO<sub>2</sub>.

Figure S7. The optimized structures of [Emim][CF<sub>3</sub>SO<sub>3</sub>]<sup>•••</sup>CO<sub>2</sub> and [Emim][CF<sub>3</sub>SO<sub>3</sub>]<sup>•••</sup>SO<sub>2</sub>.

Figure S8. The optimized structures of [Bmim][BF<sub>4</sub>]-GPA.

Figure S9. The optimized structures of [Emim][CF<sub>3</sub>SO<sub>3</sub>]-GPA.

Figure S10. The optimized structures of [Bmim][BF<sub>4</sub>]-GPA<sup>•••</sup>CO<sub>2</sub>.

Figure S11. The optimized structures of [Emim][CF<sub>3</sub>SO<sub>3</sub>]-GPA<sup>•••</sup>CO<sub>2</sub>.

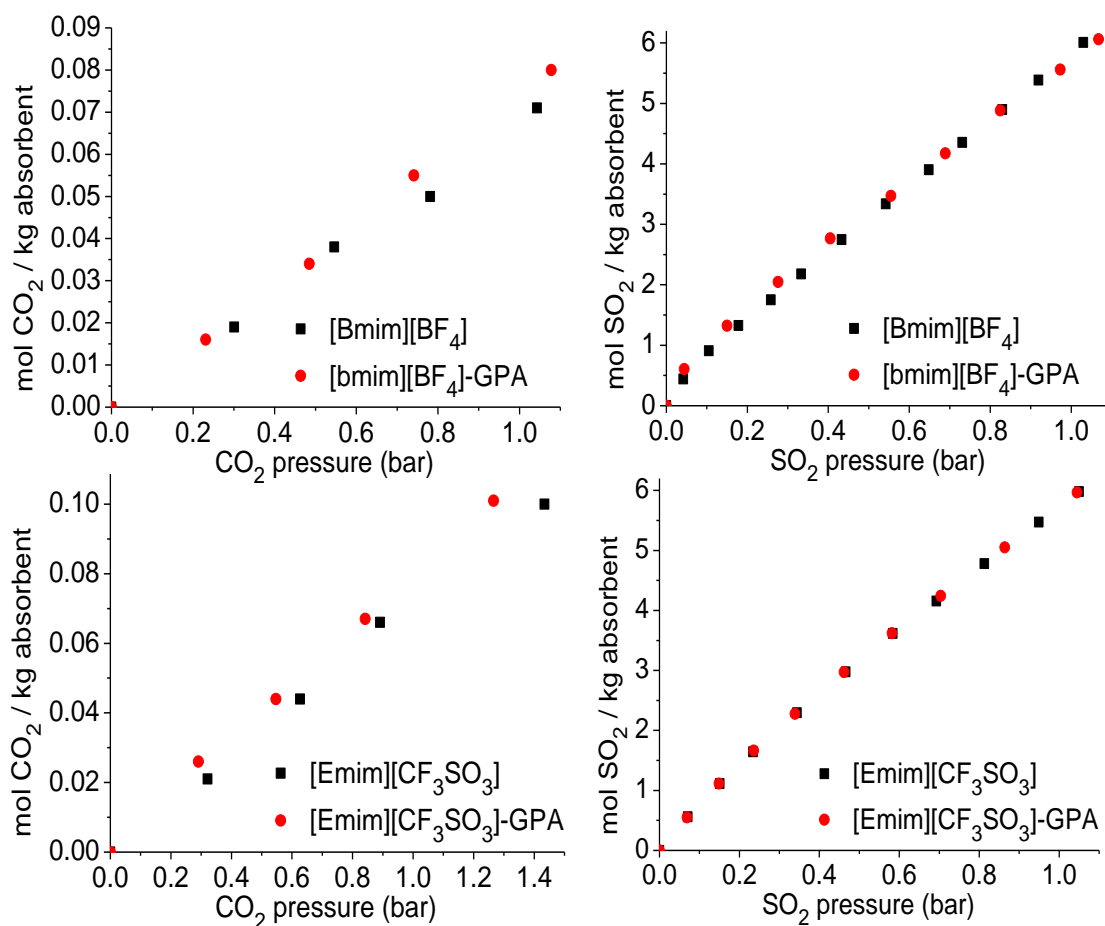

Fig. S1 The solubility of CO<sub>2</sub> and SO<sub>2</sub> in different absorbents.

Table S1. The dependence of gas solubility (Sol) in ILs on the pressure (P).<sup>a</sup>

|                                              | CO <sub>2</sub>     |                | SO <sub>2</sub>    |                |
|----------------------------------------------|---------------------|----------------|--------------------|----------------|
|                                              | Relationship        | R <sup>2</sup> | Relationship       | R <sup>2</sup> |
| [Bmim][BF <sub>4</sub> ]                     | <i>Sol = 0.067P</i> | 0.997          | <i>Sol = 5.65P</i> | 0.998          |
| [Bmim][BF <sub>4</sub> ]-GPA                 | <i>Sol = 0.075P</i> | 0.999          | <i>Sol = 5.43P</i> | 0.994          |
| [Emim][CF <sub>3</sub> SO <sub>3</sub> ]     | <i>Sol = 0.071P</i> | 0.998          | <i>Sol = 5.59P</i> | 0.997          |
| [Emim][CF <sub>3</sub> SO <sub>3</sub> ]-GPA | <i>Sol = 0.079P</i> | 0.999          | <i>Sol = 5.63P</i> | 0.996          |

<sup>a</sup> Obtained by data regression analysis in Fig. S1. R<sup>2</sup> is the correlation coefficient.

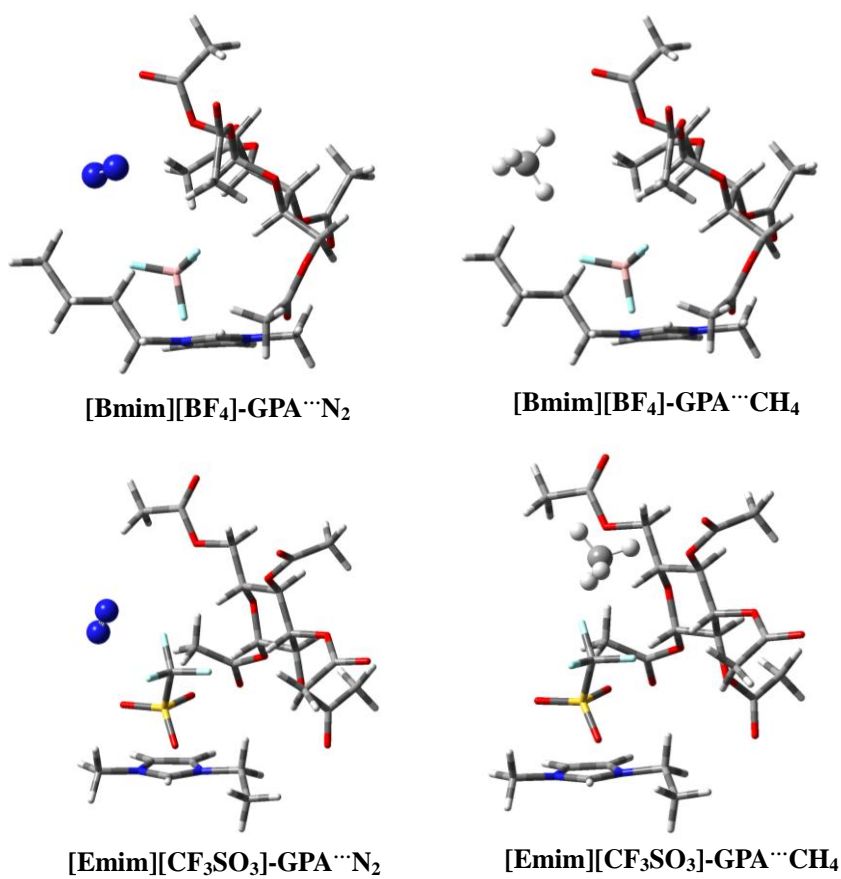

Figure S2. The optimized structures of IL-GPA...N<sub>2</sub> and IL-GPA...CH<sub>4</sub>.

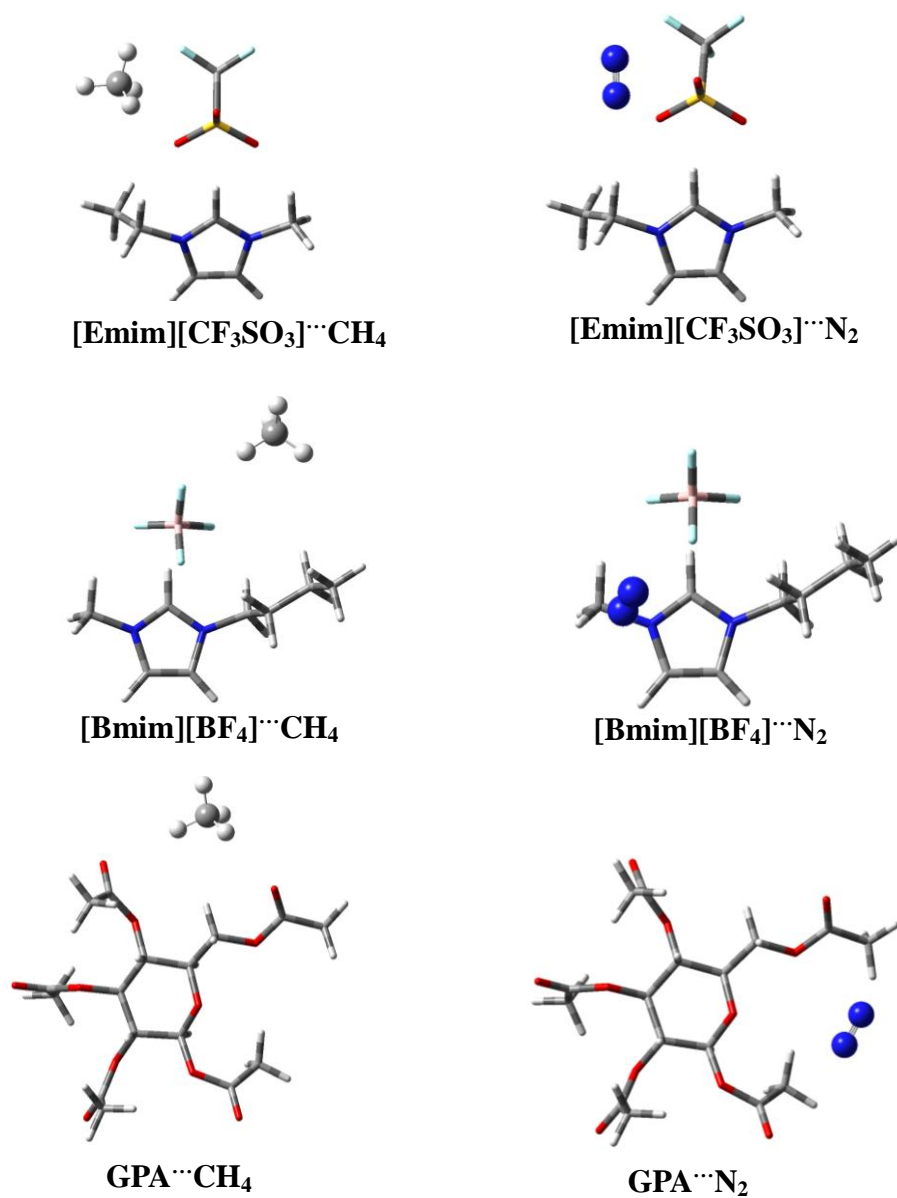

Figure S3. The optimized structures of IL<sup>+</sup>N<sub>2</sub>, IL<sup>+</sup>CH<sub>4</sub>, GPA<sup>+</sup>N<sub>2</sub>, and GPA<sup>+</sup>CH<sub>4</sub>.

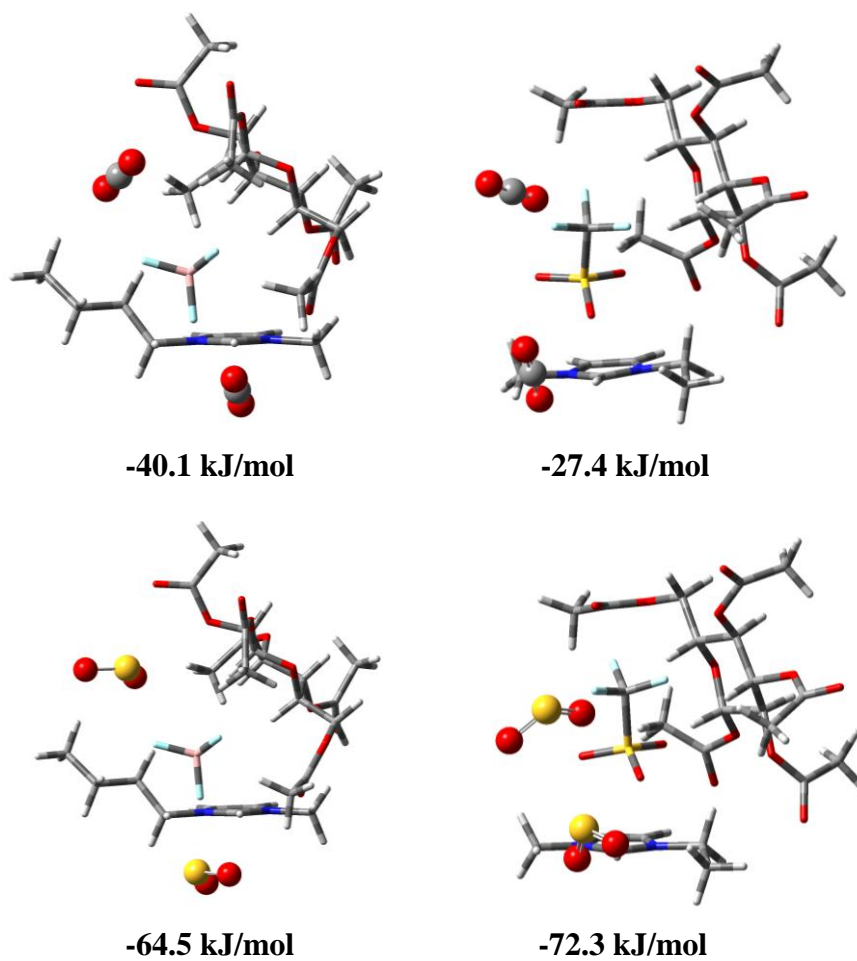

Figure S4. The optimized structures of IL-GPA $\cdots$ CO<sub>2</sub>, and IL-GPA $\cdots$ SO<sub>2</sub>. The shown values mean the binding energies between IL-GPA and CO<sub>2</sub>/ SO<sub>2</sub>.

Table S2. The 2-molecules interaction energies (in kJ/mol) of IL<sup>\*\*\*</sup>gas, GPA<sup>\*\*\*</sup>gas, or IL-GPA<sup>\*\*\*</sup>gas.

|                                              | 2CO <sub>2</sub> | 2SO <sub>2</sub> |
|----------------------------------------------|------------------|------------------|
| [Bmim][BF <sub>4</sub> ]                     | -33.7            | -71.0            |
| [Emim][CF <sub>3</sub> SO <sub>3</sub> ]     | -27.3            | -79.9            |
| GPA                                          | -19.2            | -38.8            |
| [Bmim][BF <sub>4</sub> ]-GPA                 | -40.1            | -64.5            |
| [Emim][CF <sub>3</sub> SO <sub>3</sub> ]-GPA | -27.4            | -72.3            |

<sup>a</sup> The structures of two gas molecules interaction were presented in [Fig. S2~S5](#) of Supplementary Information.

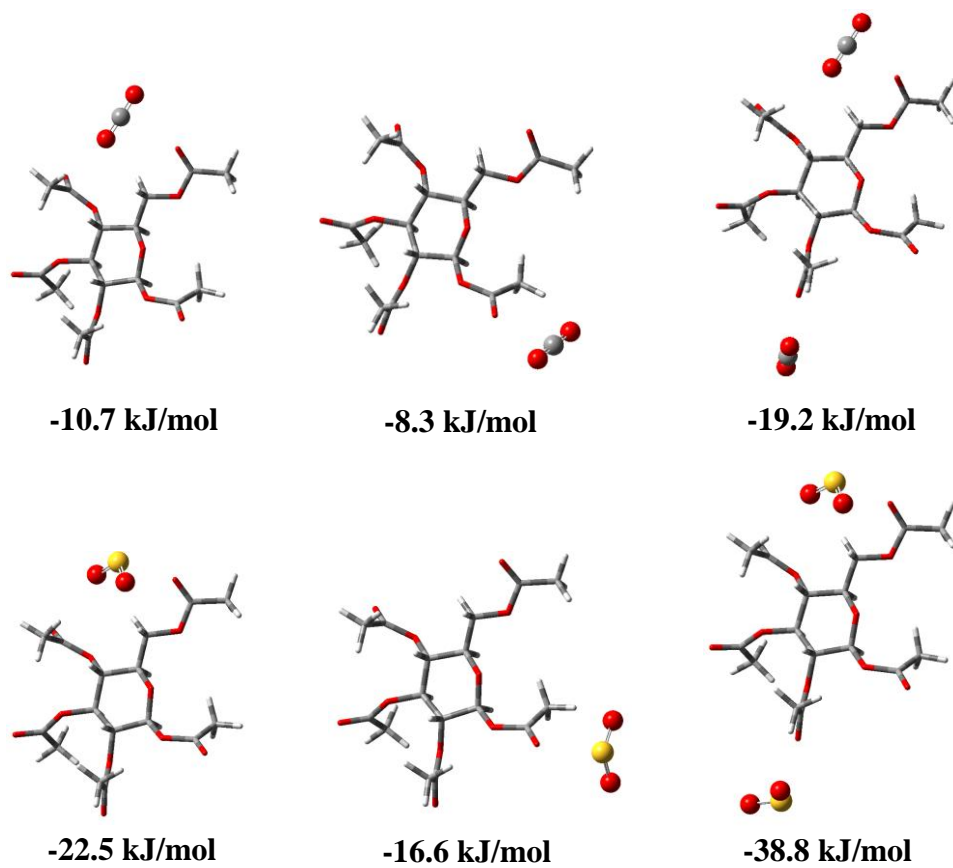

Figure S5. The optimized structures of GPA $\cdots$ CO<sub>2</sub> and GPA $\cdots$ SO<sub>2</sub>. The shown values mean the binding energies between GPA and CO<sub>2</sub>/SO<sub>2</sub>.



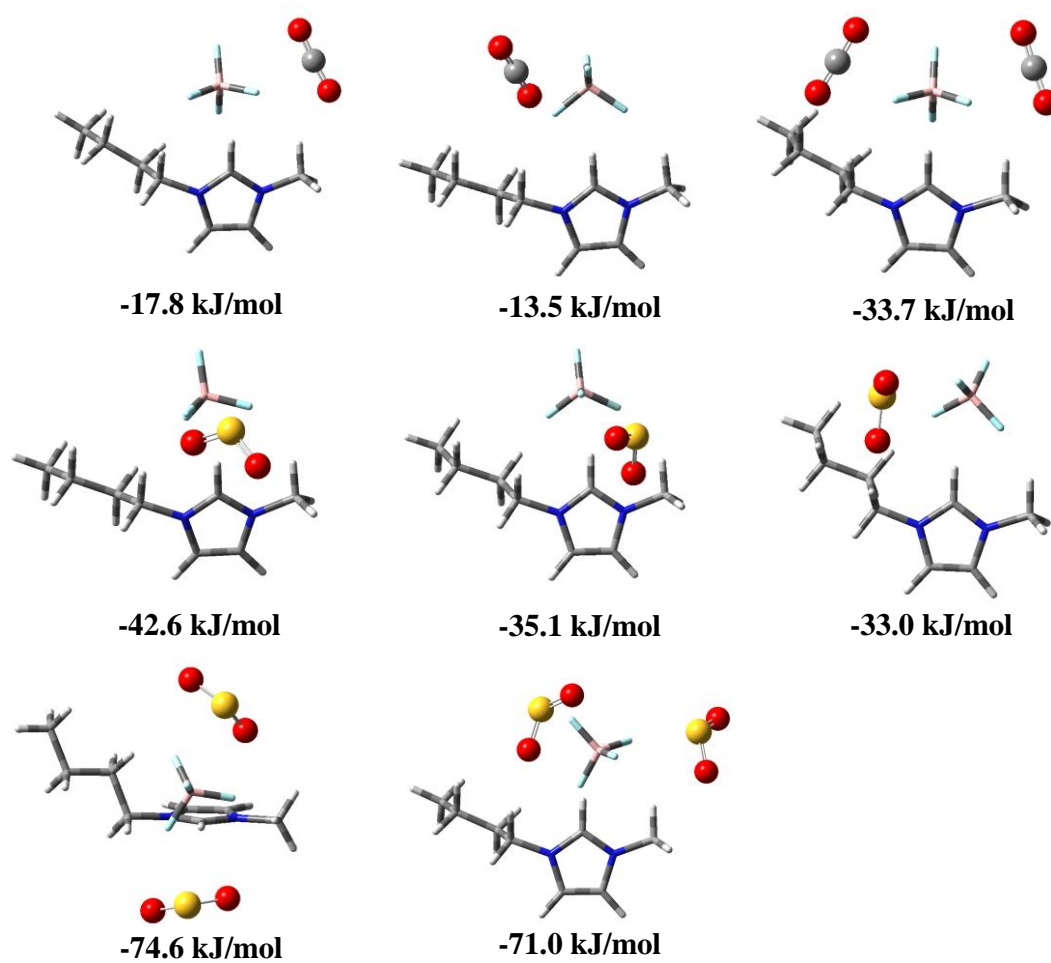

Figure S6. The optimized structures of [Bmim][BF<sub>4</sub>]<sup>+</sup>CO<sub>2</sub> and [Bmim][BF<sub>4</sub>]<sup>+</sup>SO<sub>2</sub>. The shown values mean the binding energies between [Bmim][BF<sub>4</sub>] and CO<sub>2</sub>/SO<sub>2</sub>.

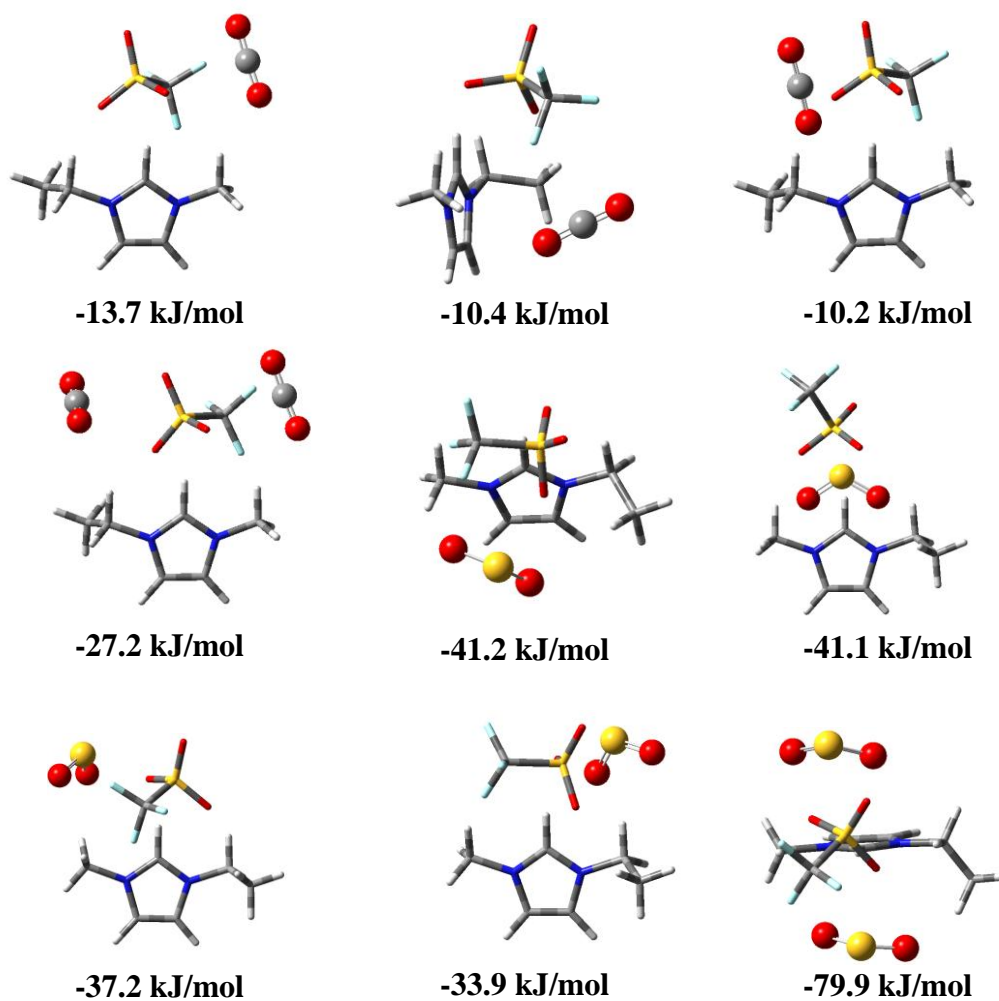

Figure S7. The optimized structures of [Emim][CF<sub>3</sub>SO<sub>3</sub>]<sup>+</sup>CO<sub>2</sub> and [Emim][CF<sub>3</sub>SO<sub>3</sub>]<sup>+</sup>SO<sub>2</sub>. The shown values mean the binding energies between [Emim][CF<sub>3</sub>SO<sub>3</sub>] and CO<sub>2</sub>/ SO<sub>2</sub>.

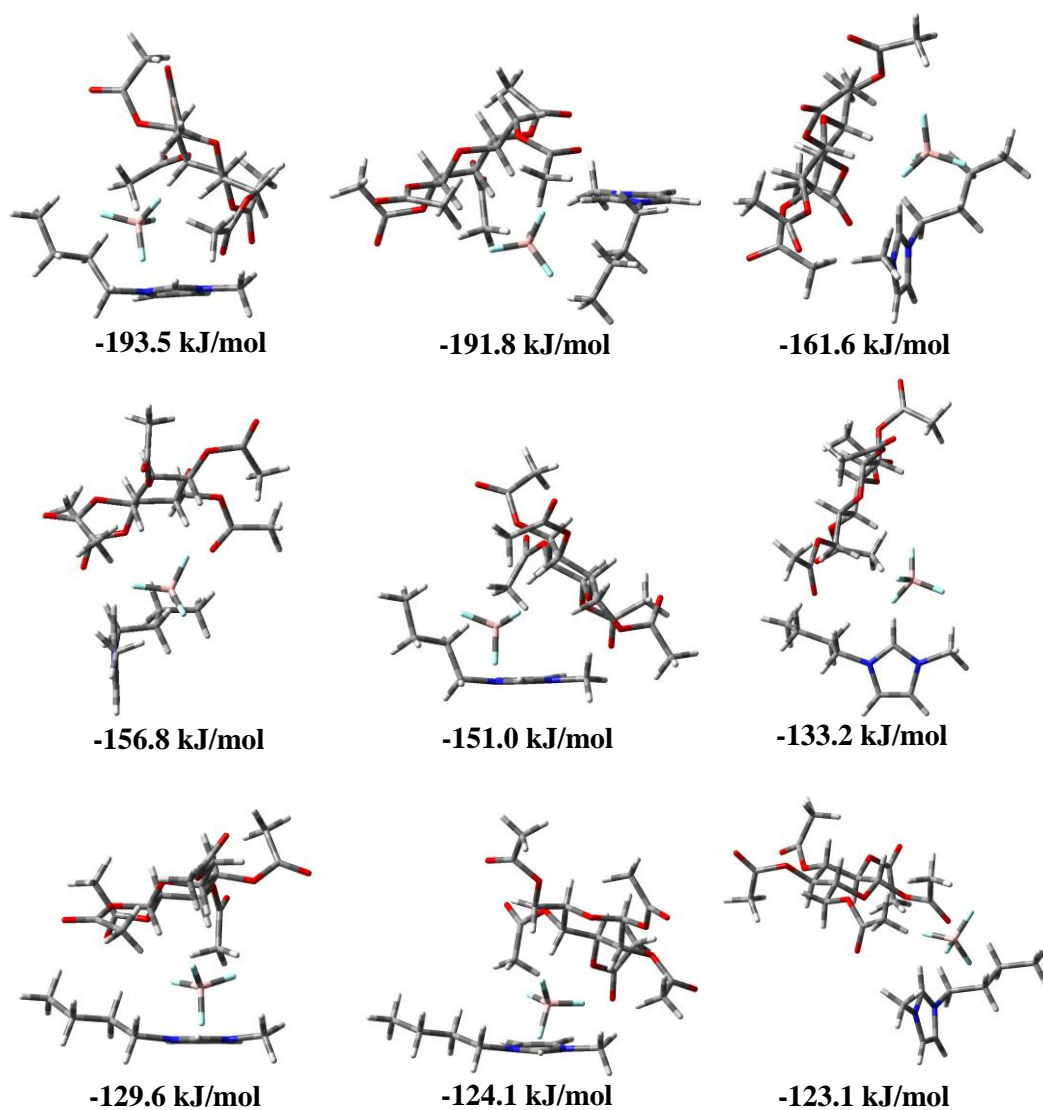

Figure S8. The optimized structures of [Bmim][BF<sub>4</sub>]-GPA. The shown values mean the binding energies between [Bmim][BF<sub>4</sub>] and GPA.

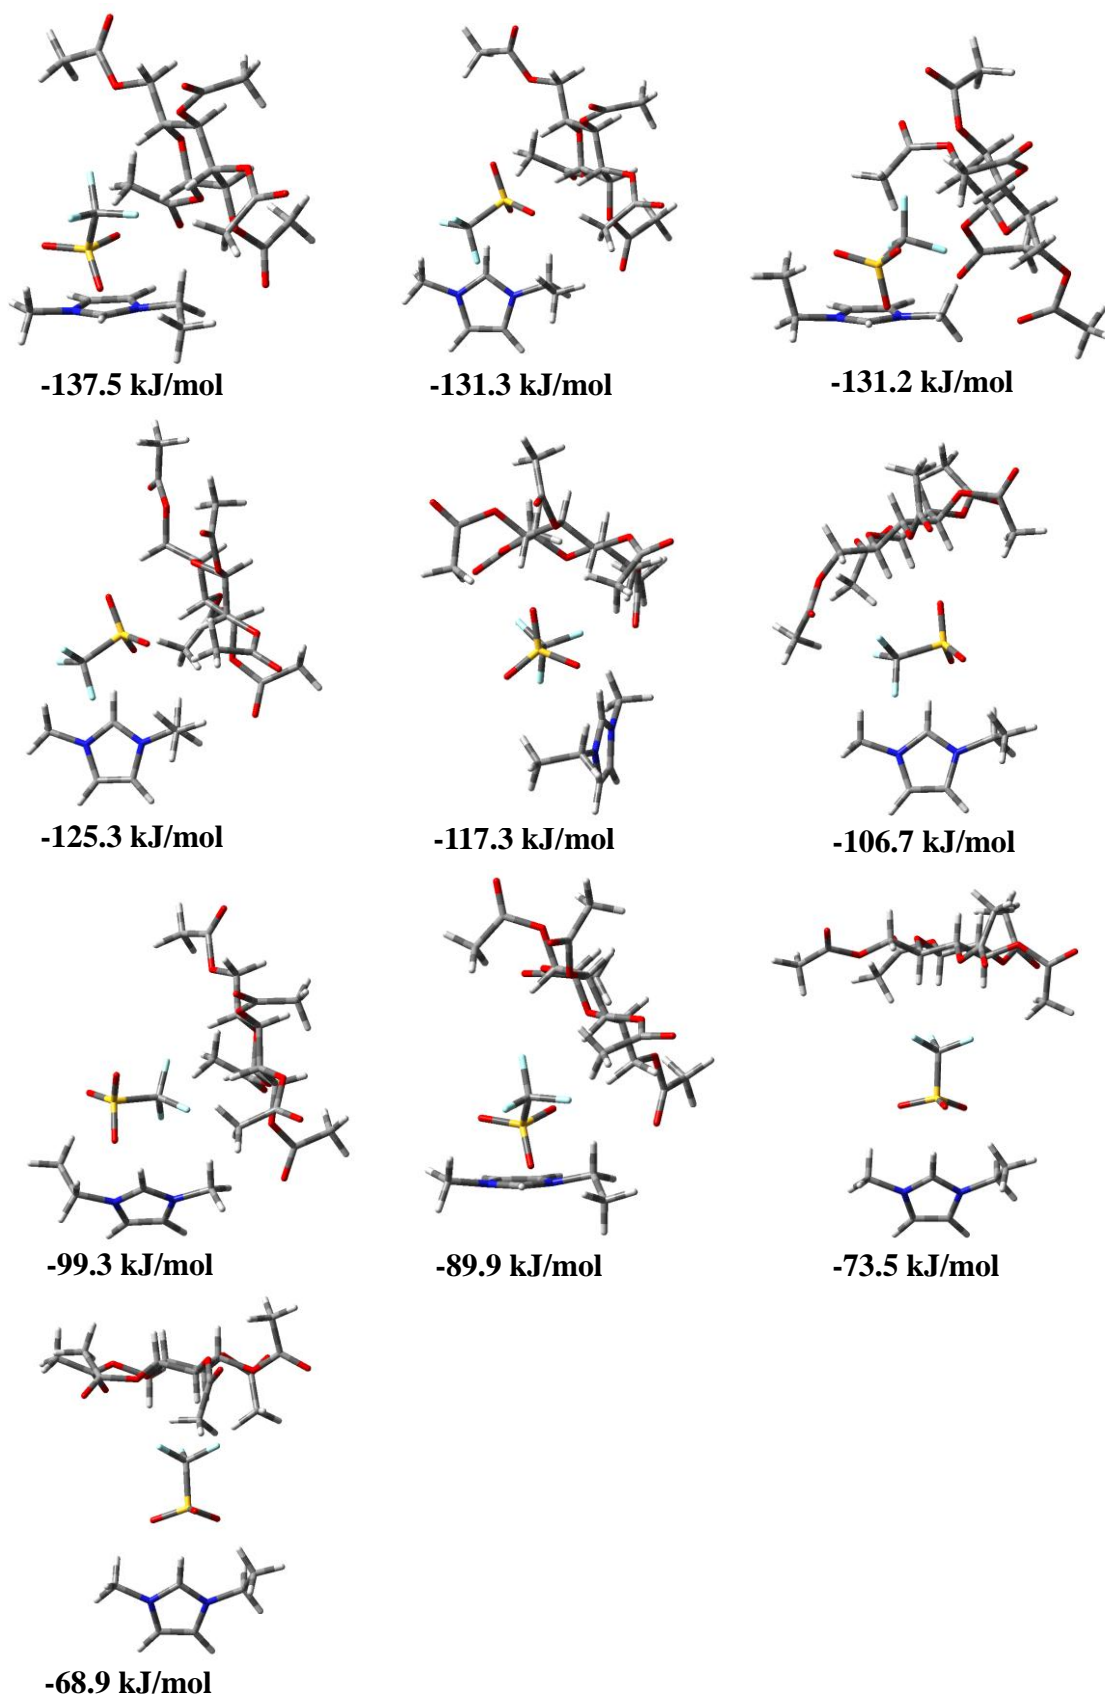

Figure S9. The optimized structures of [Emim][CF<sub>3</sub>SO<sub>3</sub>]-GPA. The shown values mean the binding energies between [Emim][CF<sub>3</sub>SO<sub>3</sub>] and GPA.

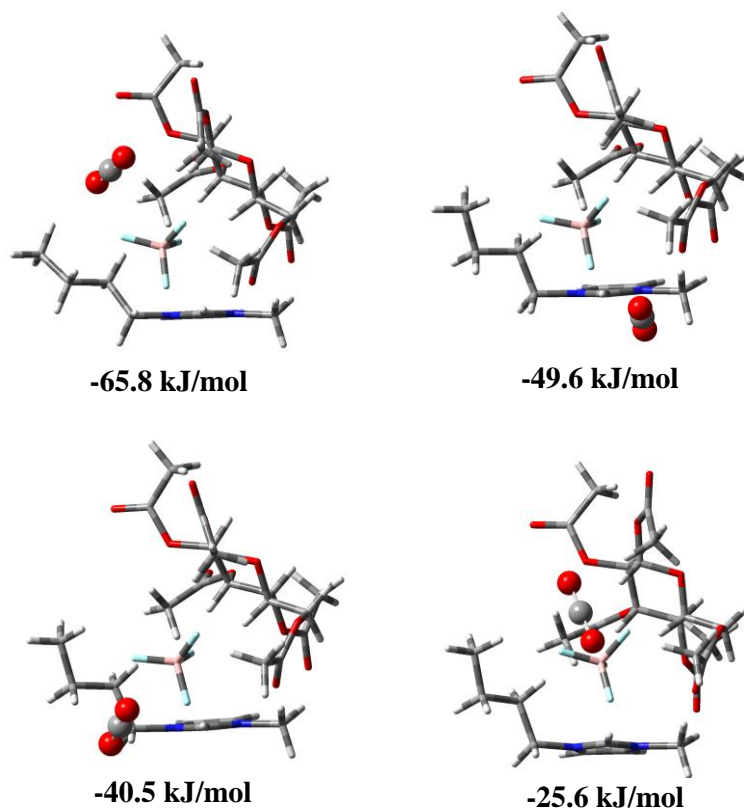

Figure S10. The optimized structures of [Bmim][BF<sub>4</sub>]-GPA<sup>••</sup>CO<sub>2</sub>. The shown values mean the binding energies between CO<sub>2</sub> and the most stable [Bmim][BF<sub>4</sub>]-GPA.

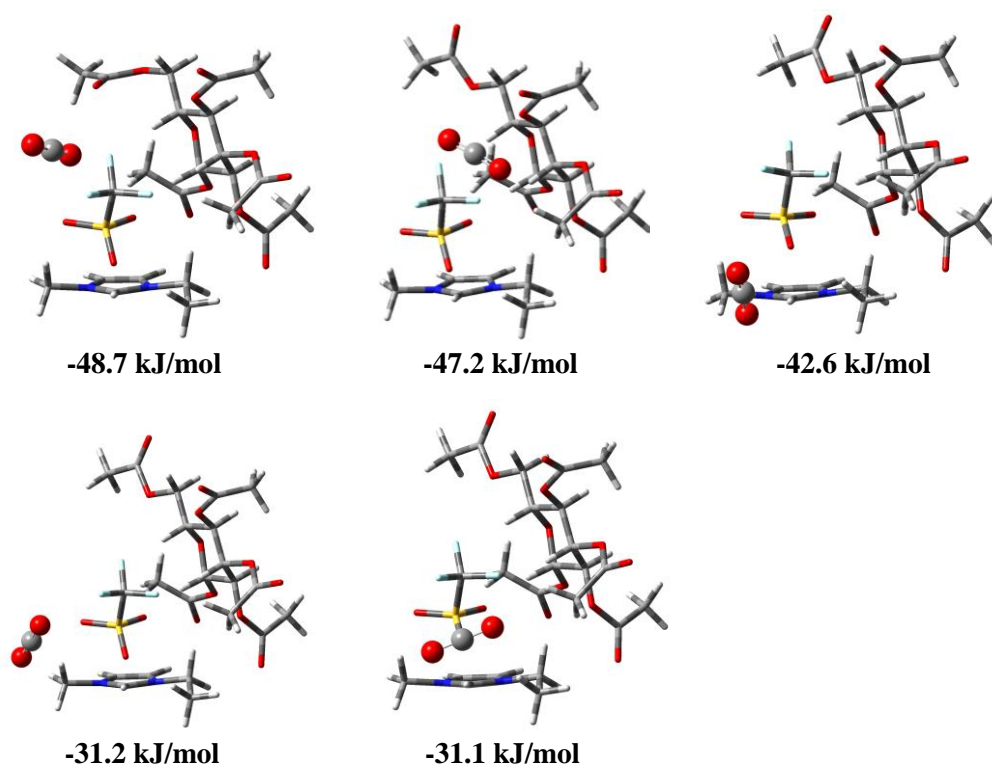

Figure S11. The optimized structures of [Emim][CF<sub>3</sub>SO<sub>3</sub>]-GPA<sup>+</sup>CO<sub>2</sub>. The shown values mean the binding energies between CO<sub>2</sub> and the most stable [Emim][CF<sub>3</sub>SO<sub>3</sub>]-GPA.
